# Supplementary material for: Occurrence and persistence of perfluorooctanesulfonate and other perfluorinated surfactants in groundwater at a fire-training area at Wurtsmith Air Force Base, Michigan, USAElectronic supplementary information (ESI) available: Map of location of Wurtsmith Air Force Base, Oscoda, MI and surrounding states. See http://www.rsc.org/suppdata/em/b2/b212497a/
Source: Royal Society of Chemistry journal article supplement (doi:10.1039/b212497a), 2003-03-10
Supplement: map.pdf [file map.pdf]

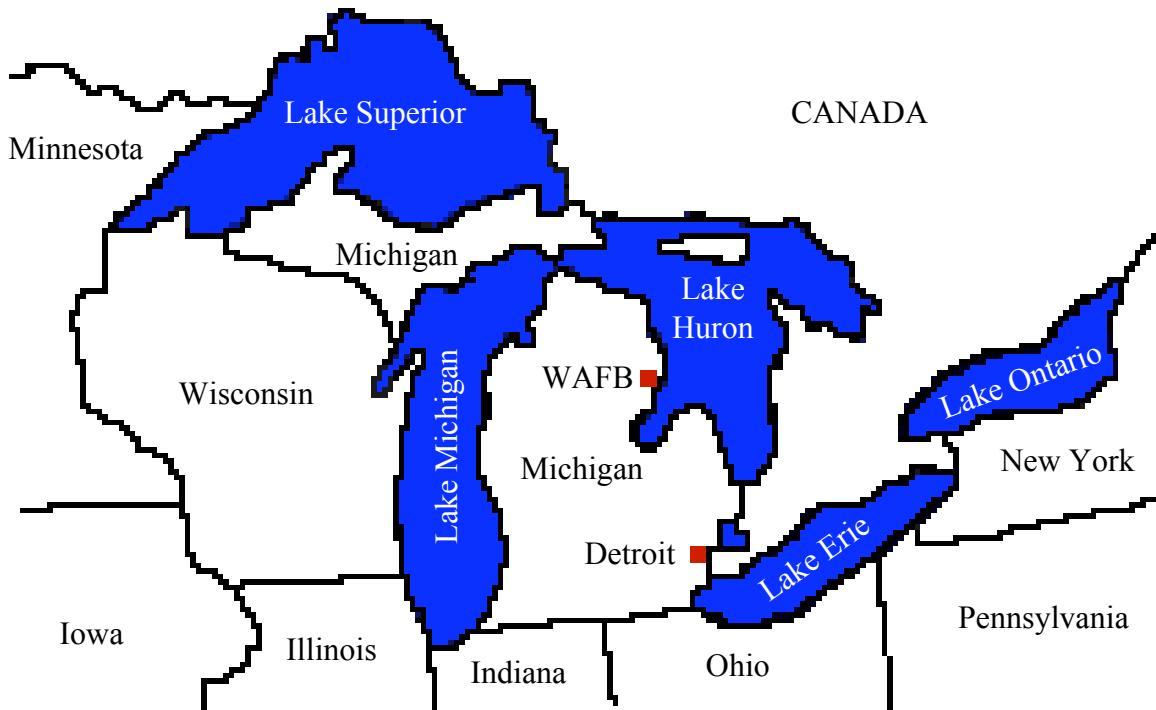

Map showing the location of Wurtsmith Air Force Base (WAFB), Oscoda, Michigan in relationship to the surrounding states and Canada.
